# Supplementary material
Source: MDPI journal article supplement (https://www.mdpi.com/2073-4433/13/2/291)
Supplement: s1 [file s1]

## Experimental and Theoretical Studies of Trans-2-Pentenal Atmospheric Ozonolysis

Carmen Kalalian, Asma Grira, Jan Niklas Illmann, Iulia Patroescu-Klotz, Gisèle El Dib, Patrice Coddeville, André Canosa, Peter Wiesen, Basheer Azaad, Lakshmi pathi Senthilkumar, Estelle Roth, Alexandre Tomas and Abdelkhaleq Chakir

### SPME-GC/MS (RASC-GSMA)

Sampling of the reaction gas mixture was done by exposing a polydimethylsiloxane / divinylbenzene (PDMS/DVB) fiber previously covered with O-(2,3,4,5,6-Pentafluorobenzyl) hydroxylamine hydrochloride (PFBHA) for 5 min in the simulation chamber. This method consists of exposing the PDMS/DVB fiber for one hour in the head space of a vial containing 4 mL of an aqueous solution of PFBHA (0.4 g/L) under a magnetic stir. These conditions ensure a maximum coating of the fiber by the PFBHA and a sufficient quantity of oxime for the detection. The aldehydes present in the simulation chamber adsorb on the PFBHA-doped fiber and form the corresponding oxime.

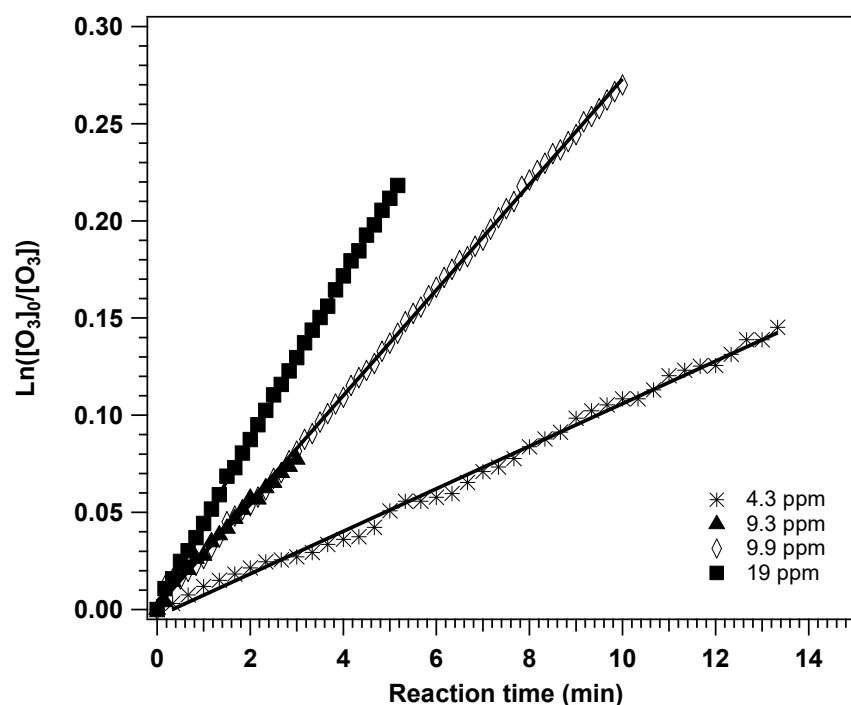

**Figure S1.** Ozone reaction profiles (Ln scale) as a function of reaction time for  $[T2P]_0 \approx 4.3\text{--}19$  ppm and  $[O_3]_0 \approx 270\text{--}440$  ppb at room temperature ( $T = 298$  K) obtained in the ASC chamber.

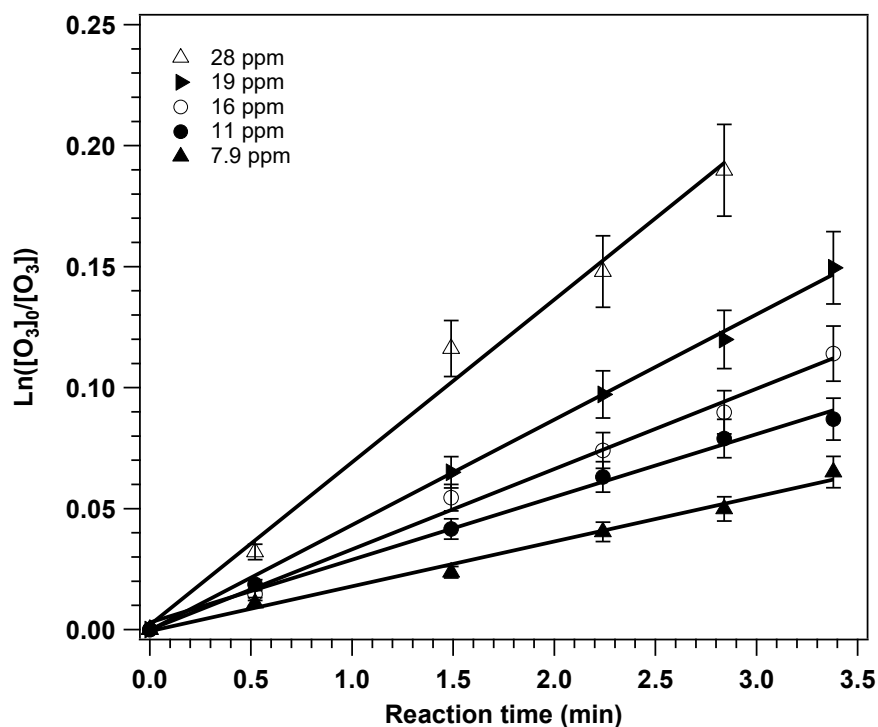

**Figure S2.** Ozone reaction profiles (Ln scale) as a function of reaction time for  $([T2P]_0 \approx 7.9\text{--}28\text{ ppm})$  and  $[O_3]_0 \approx 550\text{ ppb}$  without an OH scavenger at room temperature ( $T = 298\text{ K}$ ) obtained in LFR. Error bars correspond to  $1\sigma$ .

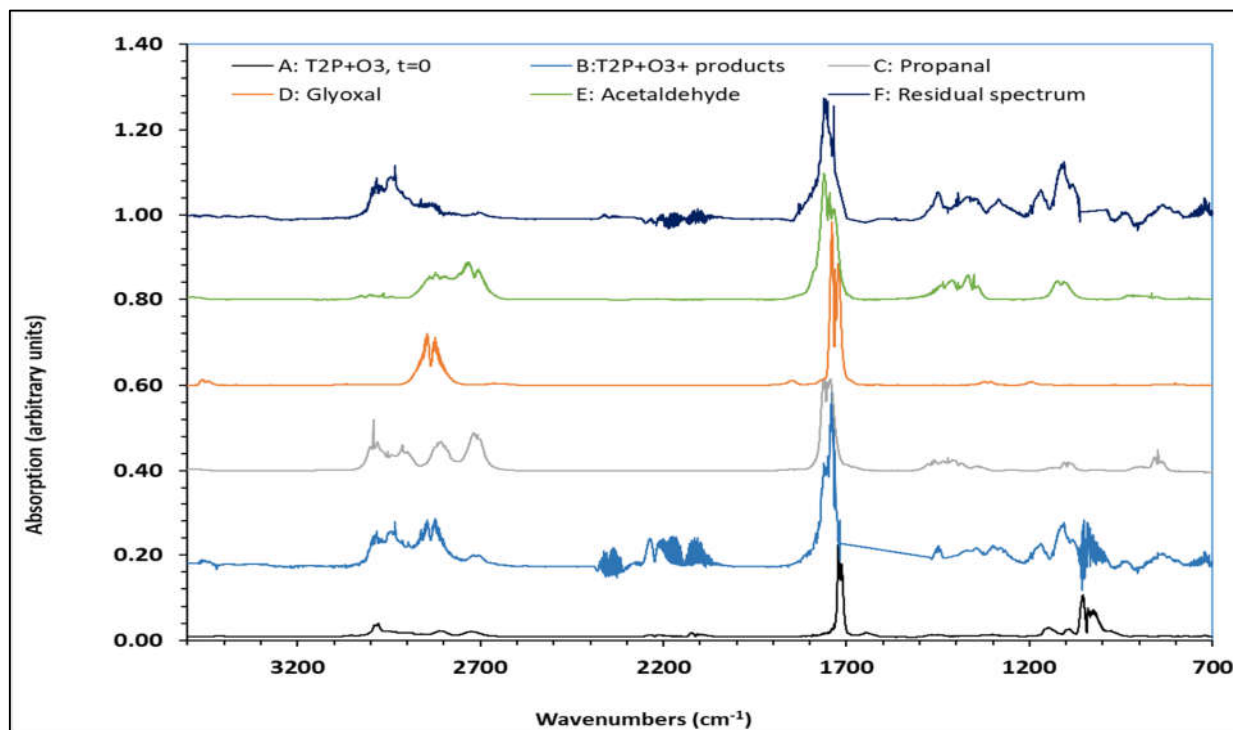

**Figure S3.** IR spectra from QUAREC. From bottom to top: Panel A shows the IR spectrum of a mixture air/T2P. Panel B shows the IR spectrum at the end of the reaction, including the product. Panels C, D and E show the reference spectra of propanal, glyoxal, and acetaldehyde. Panel F shows the resulting IR spectrum after removing the residual T2P and  $O_3$ .

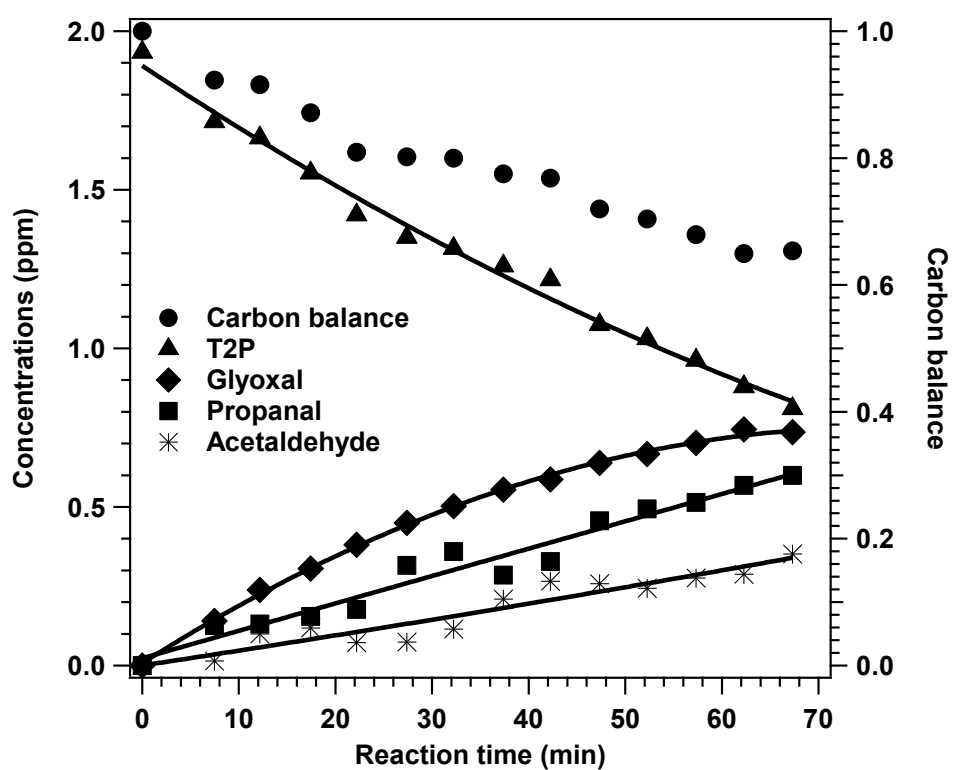

**Figure S4.** Temporal evolution of T2P and the products identified by FTIR during ozonolysis in QUAREC.

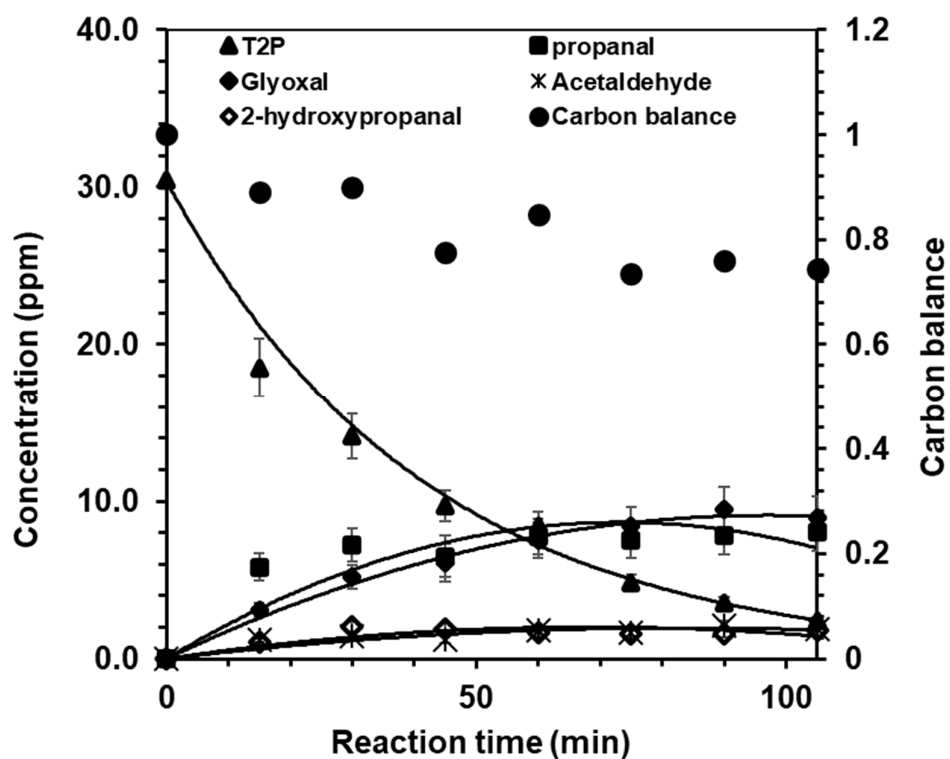

**Figure S5.** Temporal evolution of T2P and the products identified by SPME-GC / MS and FTIR during ozonolysis in RASC.

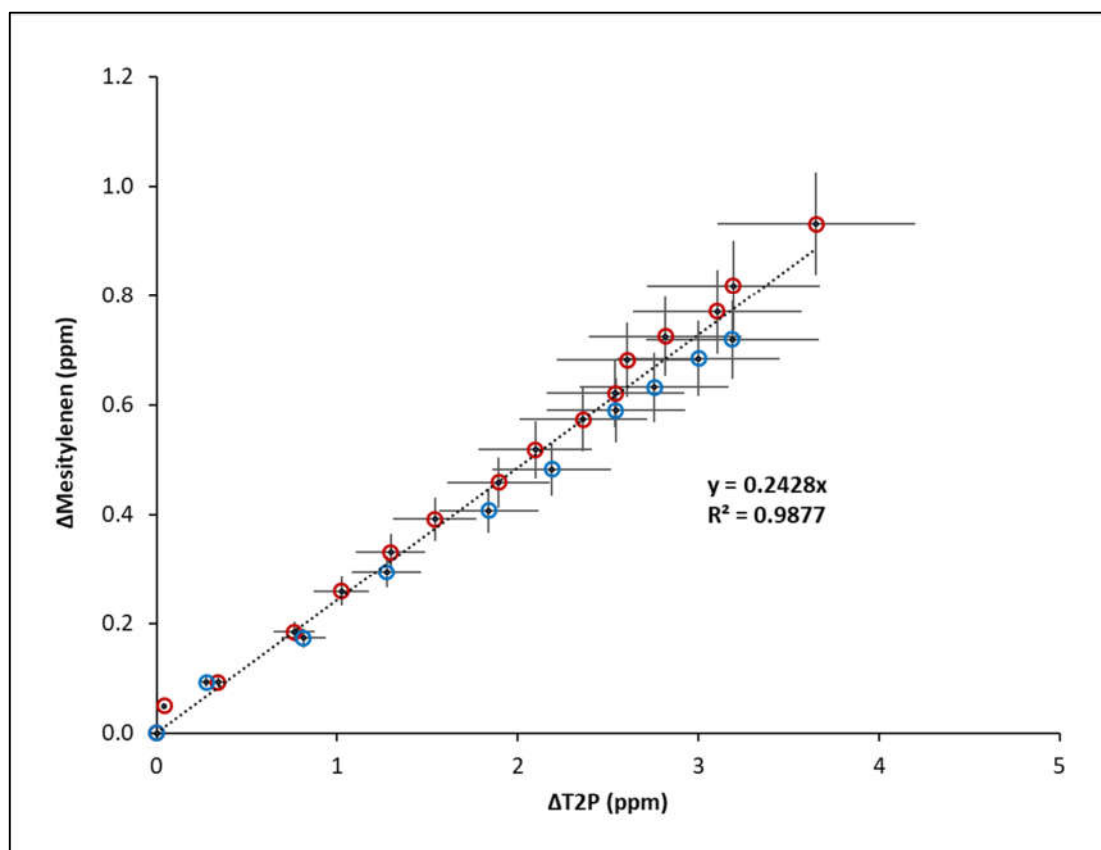

**Figure S6.** OH production in two T2P + O<sub>3</sub>/mesitylene experiments (BUW). The error bars represent the errors due to evaluation and calibration procedures, 15% and 10% for T2P and mesitylene, respectively.

**Table S1.** Data for Figure 1.

| [T2P]-ASC (molecule/cm3) | k'-ASC (s-1) | [T2P]-LFR (molecule/cm3) | k'-LFR (s-1) |
|--------------------------|--------------|--------------------------|--------------|
| 0                        | 0.00003      | 0                        | 0.000083     |
| 2.29E+14                 | 0.000453     | 2.77E+14                 | 0.000432     |
| 4.78E+14                 | 0.0007       | 3.95E+14                 | 0.0005533    |
| 1.05E+14                 | 0.000183     | 1.96E+14                 | 0.0003083    |
| 2.43E+14                 | 0.000415     | 6.87E+14                 | 0.00112      |
|                          |              | 4.64E+14                 | 0.000725     |

**Table S2.** Data for Figure 2.

| $\Delta T2P$ | [C2H5CHO] (ppmv) | [GLY] (ppmv) | [CH3CHO] (ppmv) |
|--------------|------------------|--------------|-----------------|
| 0            | 0                | 0            | 0               |
| 0.21827606   | 0.06308          | 0.070434     | 0.007336        |
| 0.26962521   | 0.0655975        | 0.1191645    | 0.049911        |
| 0.38007949   | 0.0774725        | 0.1530165    | 0.059212        |
| 0.51241539   | 0.0883975        | 0.190281     | 0.036025        |
| 0.58281146   | 0.158175         | 0.224952     | 0.037073        |
| 0.61835822   | 0.1797875        | 0.251433     | 0.0577055       |
| 0.67311333   | 0.1427375        | 0.2772315    | 0.1048655       |
| 0.71662658   | 0.1640175        | 0.293475     | 0.1330305       |
| 0.85836084   | 0.2282375        | 0.31941      | 0.1288385       |
| 0.90281759   | 0.2468575        | 0.3334695    | 0.121699        |
| 0.97029179   | 0.2572125        | 0.3509415    | 0.138074        |
| 1.05443111   | 0.284145         | 0.3722355    | 0.143838        |
| 0.08749025   | 0.0232275        | 0.023751     | 0.0287545       |
| 0.22335142   | 0.0475475        | 0.0819       | 0.0405445       |
| 0.33486937   | 0.0703           | 0.1259895    | 0.0294095       |
| 0.45971218   | 0.10963          | 0.164073     | 0.049911        |
| 0.55207084   | 0.12787          | 0.203931     | 0.06157         |
| 0.63013329   | 0.14269          | 0.2340975    | 0.061439        |
| 0.7125139    | 0.1656325        | 0.2597595    | 0.064714        |
| 0.83427001   | 0.1911875        | 0.276549     | 0.090914        |
| 0.85888942   | 0.192755         | 0.301938     | 0.0727705       |
| 0.91497896   | 0.203775         | 0.3220035    | 0.0853465       |
| 1.01065373   | 0.2354575        | 0.319956     | 0.1005425       |
| 0.98976373   | 0.22211          | 0.3544905    | 0.0715915       |
| 0.19169996   | 0.094335         | 0.112749     | 0.067334        |
| 0.23896544   | 0.106875         | 0.145782     | 0.022139        |
| 0.31656875   | 0.10545          | 0.18291      | 0.028034        |
| 0.42209166   | 0.144495         | 0.209937     | 0.052138        |
| 0.4524295    | 0.16017          | 0.25116      | 0.048732        |
| 0.5271749    | 0.19741          | 0.265083     | 0.102311        |
| 0.6069766    | 0.18392          | 0.276549     | 0.059736        |
| 0.64742705   | 0.205865         | 0.300027     | 0.074015        |
| 0.71227968   | 0.222775         | 0.316134     | 0.073229        |
| 0.79581865   | 0.27284          | 0.331149     | 0.139515        |
| 0.78614572   | 0.265905         | 0.357084     | 0.123009        |
| 1.06204417   | 0.289655         | 0.337974     | 0.160475        |

|            |          |          |          |
|------------|----------|----------|----------|
| 1.10007639 | 0.29127  | 0.376194 | 0.136633 |
| 0.06225927 | 0.011875 | 0.034944 | 0.015982 |
| 0.13681075 | 0.036385 | 0.063882 | 0.016637 |
| 0.19475977 | 0.05187  | 0.092274 | 0.012707 |
| 0.25462445 | 0.06935  | 0.114387 | 0.034191 |
| 0.33604042 | 0.0969   | 0.13923  | 0.035239 |
| 0.39191412 | 0.108965 | 0.157521 | 0.043885 |
| 0.38441108 | 0.100985 | 0.176631 | 0.046243 |
| 0.50621576 | 0.149055 | 0.188643 | 0.047029 |
| 0.51323988 | 0.147155 | 0.211575 | 0.056068 |
| 0.52345679 | 0.143925 | 0.22659  | 0.063404 |
| 0.6270626  | 0.18221  | 0.238329 | 0.056723 |
| 0.58922812 | 0.167485 | 0.256347 | 0.070609 |
| 0.03836758 | 0.007505 | 0.018564 | ND       |
| 0.07466632 | 0.014535 | 0.036582 | ND       |
| 0.105887   | 0.023085 | 0.053508 | ND       |
| 0.1472638  | 0.032965 | 0.066339 | ND       |
| 0.16889258 | 0.035435 | 0.071253 | ND       |
| 0.17998908 | 0.02964  | 0.085995 | ND       |
| 0.20876477 | 0.05092  | 0.095004 | ND       |
| 0.21910897 | 0.05871  | 0.104832 | ND       |
| 0.26556383 | 0.059565 | 0.107835 | ND       |
| 0.28455955 | 0.062795 | 0.116298 | ND       |
| 0.30750486 | 0.06783  | 0.126399 | ND       |
| 0.32781711 | 0.07163  | 0.140049 | ND       |
| 0.37784542 | 0.090345 | 0.140049 | ND       |
| 0.38894193 | 0.09994  | 0.151515 | ND       |
| 0.41658916 | 0.09937  | 0.151788 | ND       |
| 0.39627691 | 0.08987  | 0.15561  | ND       |

**Table S3:** Data for Figure 3

| $\Delta$ [T2P]<br>(ppmv) | [Glyoxal]<br>(ppmv) | $\Delta$ [T2P]<br>(ppmv) | [Propanal]<br>(ppmv) | $\Delta$ [T2P]<br>(ppmv) | [Acetaldehyde]<br>(ppmv) | $\Delta$ [T2P]<br>(ppmv) | [2-hydroxypropanal]<br>(ppmv) |
|--------------------------|---------------------|--------------------------|----------------------|--------------------------|--------------------------|--------------------------|-------------------------------|
| 0.00                     | 0.00                | 0.00                     | 0.00                 | 0                        | 0                        | 0                        | 0                             |
| 0.59                     | 0.65                | 0.59                     | 1.13                 | 0.5915126                | 0.24165066               | 0.82559705               | 0.1065092                     |
| 3.27                     | 1.16                | 3.27                     | 1.62                 | 3.27352626               | 0.41127136               | 2.02444772               | 0.19294595                    |
| 3.49                     | 3.49                | 8.87                     | 4.42                 | 6.58272074               | 0.79964005               | 2.82613571               | 0.17630492                    |
| 6.58                     | 3.38                | 8.89                     | 2.35                 | 7.77121359               | 0.71796972               | 2.95212866               | 0.33448791                    |
| 7.16                     | 4.80                | 9.23                     | 4.38                 | 8.87268902               | 1.242788                 | 3.53612581               | 0.06393475                    |
| 7.77                     | 4.00                | 10.71                    | 5.31                 | 8.88649146               | 1.08042131               | 3.9112879                | 0.2879868                     |
| 8.87                     | 2.96                | 11.51                    | 5.92                 | 9.22539218               | 1.26270447               | 4.44787208               | 0.40386952                    |
| 8.89                     | 5.41                | 12.22                    | 5.62                 | 10.1487658               | 1.17313787               | 4.633426                 | 0.09329255                    |
| 10.15                    | 5.82                | 12.36                    | 5.42                 | 10.7054296               | 1.43011124               | 5.17793301               | 0.37469957                    |
| 10.71                    | 4.97                | 12.55                    | 5.60                 | 10.767593                | 1.19385073               | 5.68682234               | 0.37124779                    |
| 10.77                    | 6.70                | 12.75                    | 4.39                 | 11.0864905               | 1.26830169               | 6.67345708               | 0.49305613                    |
| 11.09                    | 6.32                | 12.79                    | 4.72                 | 11.5092039               | 1.37705484               | 6.91345407               | 0.25501247                    |
| 11.51                    | 4.94                | 12.81                    | 3.92                 | 12.2159011               | 0.75123044               | 8.1386609                | 0.45713347                    |
| 12.22                    | 6.90                | 13.05                    | 5.67                 | 12.357504                | 1.02977656               | 8.25329325               | 0.47714268                    |
| 12.35                    | 7.56                | 13.05                    | 5.06                 | 12.5549642               | 1.2412959                | 8.63995313               | 0.4761807                     |
| 12.36                    | 7.44                | 13.05                    | 6.50                 | 12.752001                | 1.02152259               | 9.18169391               | 0.52261816                    |
| 12.55                    | 7.23                | 13.11                    | 5.74                 | 12.7851224               | 1.02761572               | 9.35940651               | 0.57775184                    |
| 12.75                    | 6.49                | 13.11                    | 5.60                 | 12.80121                 | 1.16054584               | 9.58064983               | 0.40591133                    |
| 12.79                    | 6.18                | 13.37                    | 4.75                 | 12.808695                | 0.98954475               | 9.65219772               | 0.42876877                    |
| 12.80                    | 8.39                | 13.52                    | 5.27                 | 13.0489067               | 1.15084523               | 9.83001863               | 0.58470561                    |
| 12.81                    | 6.49                | 13.53                    | 5.21                 | 13.0522112               | 1.2214693                | 9.86535001               | 0.65169855                    |
| 13.05                    | 8.64                | 13.64                    | 6.04                 | 13.1084405               | 1.12980388               | 10.5188544               | 0.49752043                    |
| 13.05                    | 7.41                | 13.66                    | 5.78                 | 13.518354                | 1.2868676                | 11.0133847               | 0.42227872                    |
| 13.05                    | 5.82                | 13.68                    | 4.97                 | 13.5307908               | 1.49676899               | 11.0801839               | 0.34616803                    |
| 13.11                    | 6.01                | 13.97                    | 5.99                 | 13.6371714               | 0.96166811               | 11.1090268               | 0.72231047                    |
| 13.11                    | 7.39                | 14.17                    | 5.97                 | 13.6838555               | 1.18482057               | 11.2422438               | 0.63167535                    |
| 13.37                    | 5.94                | 14.18                    | 6.26                 | 13.9742261               | 1.28355873               | 11.4190147               | 0.46752287                    |
| 13.52                    | 8.33                | 14.22                    | 5.77                 | 14.0132507               | 1.07097707               | 11.692467                | 0.28638301                    |

|       |       |       |      |            |            |            |            |
|-------|-------|-------|------|------------|------------|------------|------------|
| 13.53 | 7.61  | 14.54 | 5.93 | 14.1676215 | 1.66356358 | 11.9656879 | 0.4728967  |
| 13.64 | 9.34  | 14.61 | 6.31 | 14.2230394 | 0.99837997 | 12.7713631 | 0.42678669 |
| 13.66 | 7.52  | 14.64 | 6.51 | 14.6100658 | 1.4614295  | 12.9030585 | 0.67531081 |
| 13.68 | 8.02  | 14.66 | 6.90 | 14.638213  | 1.62603407 | 13.2114809 | 0.78497667 |
| 13.75 | 8.74  | 14.68 | 7.03 | 14.6456038 | 1.46782418 | 13.6817164 | 0.48119313 |
| 13.97 | 8.37  | 14.70 | 6.02 | 14.6568688 | 1.50821352 | 14.4925876 | 0.57758004 |
| 14.01 | 7.59  | 14.87 | 7.38 | 14.6766686 | 1.40021563 | 15.2591751 | 0.73292474 |
| 14.17 | 9.44  | 14.89 | 5.16 | 14.7048446 | 1.29988189 | 17.3215003 | 0.67849124 |
| 14.22 | 7.41  | 15.01 | 6.52 | 14.761668  | 1.17592621 |            |            |
| 14.61 | 8.56  | 15.03 | 5.46 | 14.8876184 | 1.41948012 |            |            |
| 14.64 | 8.05  | 15.26 | 6.79 | 15.0062079 | 1.66985677 |            |            |
| 14.66 | 9.11  | 15.76 | 7.34 | 15.033342  | 1.11837111 |            |            |
| 14.68 | 8.41  |       |      | 15.4219414 | 1.46392453 |            |            |
| 14.70 | 7.91  |       |      |            |            |            |            |
| 14.76 | 8.09  |       |      |            |            |            |            |
| 14.87 | 9.29  |       |      |            |            |            |            |
| 14.89 | 9.79  |       |      |            |            |            |            |
| 15.01 | 8.70  |       |      |            |            |            |            |
| 15.03 | 8.87  |       |      |            |            |            |            |
| 15.76 | 10.36 |       |      |            |            |            |            |



**Table S4.** The Z-matrices, energies (in Hartree), imaginary frequencies of TS structures and multiplicity of all the optimized structures at M06-2X/6-311++G(d,p) level of theory.

| Structures | Z-matrix    |   |              |   |            |  | Key points                                                                                                                                 |
|------------|-------------|---|--------------|---|------------|--|--------------------------------------------------------------------------------------------------------------------------------------------|
| R          | C           |   |              |   |            |  | Multiplicity = 1<br><br><b>Energies (Hartree)</b><br><br>ZPE = -270.375146<br>ZPE corr = 0.119069<br>H = -270.367184<br>S = 82.03cal/mol-K |
|            | C 1 R12     |   |              |   |            |  |                                                                                                                                            |
|            | H 1 R14     | 3 | A314         | 2 | D2314      |  |                                                                                                                                            |
|            | H 1 R15     | 4 | A415         | 2 | D2415      |  |                                                                                                                                            |
|            | C 2 R26     | 1 | A126         | 3 | -D3126     |  |                                                                                                                                            |
|            | H 2 R27     | 1 | A127         | 3 | D3127      |  |                                                                                                                                            |
|            | H 2 R28     | 1 | A128         | 3 | -D3128     |  |                                                                                                                                            |
|            | C 6 R69     | 2 | A269         | 1 | -D1269     |  |                                                                                                                                            |
|            | H 6 R6_10   | 2 | A26_10       | 1 | D126_10    |  |                                                                                                                                            |
|            | C 9 R9_11   | 6 | A69_11       | 2 | D269_11    |  |                                                                                                                                            |
|            | H 9 R9_12   | 6 | A69_12       | 2 | -D269_12   |  |                                                                                                                                            |
|            | O 11 R11_13 | 9 | A9_11_13     | 6 | D69_11_13  |  |                                                                                                                                            |
|            | H 11 R11_14 | 9 | A9_11_14     | 6 | -D69_11_14 |  |                                                                                                                                            |
|            | Variables:  |   |              |   |            |  |                                                                                                                                            |
|            | R12         | = | 1.53329851   |   |            |  |                                                                                                                                            |
|            | R13         | = | 1.09100133   |   |            |  |                                                                                                                                            |
|            | A213        | = | 110.79049116 |   |            |  |                                                                                                                                            |
|            | R14         | = | 1.09155099   |   |            |  |                                                                                                                                            |
|            | A314        | = | 108.34429345 |   |            |  |                                                                                                                                            |
|            | D2314       | = | 121.52167087 |   |            |  |                                                                                                                                            |
|            | R15         | = | 1.09247876   |   |            |  |                                                                                                                                            |
|            | A415        | = | 107.98525521 |   |            |  |                                                                                                                                            |
|            | D2415       | = | 121.61915346 |   |            |  |                                                                                                                                            |
|            | R26         | = | 1.49514670   |   |            |  |                                                                                                                                            |
|            | A126        | = | 111.41346710 |   |            |  |                                                                                                                                            |
|            | D3126       | = | 178.72971541 |   |            |  |                                                                                                                                            |
|            | R27         | = | 1.09248167   |   |            |  |                                                                                                                                            |
|            | A127        | = | 110.44901336 |   |            |  |                                                                                                                                            |
|            | D3127       | = | 59.09035241  |   |            |  |                                                                                                                                            |
|            | R28         | = | 1.09542421   |   |            |  |                                                                                                                                            |
|            | A128        | = | 109.12279315 |   |            |  |                                                                                                                                            |
|            | D3128       | = | 58.59810536  |   |            |  |                                                                                                                                            |
|            | R69         | = | 1.33443448   |   |            |  |                                                                                                                                            |
|            | A269        | = | 125.68839356 |   |            |  |                                                                                                                                            |
|            | D1269       | = | 118.68204083 |   |            |  |                                                                                                                                            |
|            | R6_10       | = | 1.09146448   |   |            |  |                                                                                                                                            |
|            | A26_10      | = | 116.16803820 |   |            |  |                                                                                                                                            |
|            | D126_10     | = | 59.95469022  |   |            |  |                                                                                                                                            |
|            | R9_11       | = | 1.47210442   |   |            |  |                                                                                                                                            |
|            | A69_11      | = | 120.58567807 |   |            |  |                                                                                                                                            |
|            | D269_11     | = | 178.86431177 |   |            |  |                                                                                                                                            |
|            | R9_12       | = | 1.08609152   |   |            |  |                                                                                                                                            |
|            | A69_12      | = | 122.40110792 |   |            |  |                                                                                                                                            |
|            | D269_12     | = | 1.13906439   |   |            |  |                                                                                                                                            |
|            | R11_13      | = | 1.20462230   |   |            |  |                                                                                                                                            |
|            | A9_11_13    | = | 124.32429797 |   |            |  |                                                                                                                                            |

|     |            |    |              |                            |
|-----|------------|----|--------------|----------------------------|
|     | D69_11_13  | =  | 179.89535836 |                            |
|     | R11_14     | =  | 1.10954504   |                            |
|     | A9_11_14   | =  | 114.91431372 |                            |
|     | D69_11_14  | =  | 0.14577053   |                            |
|     | O          |    |              | Multiplicity = 1           |
|     | O          | 1  | R12          |                            |
|     | O          | 1  | R13          | 2 A213                     |
|     | Variables: |    |              | <b>Energies (Hartree)</b>  |
| O3  | R12        | =  | 1.39893400   | ZPE = -225.332374          |
|     | R13        | =  | 1.39886092   | ZPE corr = 0.007302        |
|     | A213       | =  | 59.99929582  | H = -225.328496            |
|     | C          |    |              | S = 58.27cal/mol-K         |
|     | C          | 1  | R12          |                            |
|     | H          | 1  | R13          | 2 A213                     |
|     | H          | 1  | R14          | 3 A314 2 D2314             |
|     | H          | 1  | R15          | 4 A415 2 D2415             |
|     | C          | 2  | R26          | 1 A126 3 -D3126            |
|     | H          | 2  | R27          | 1 A127 3 D3127             |
|     | H          | 2  | R28          | 1 A128 3 -D3128            |
|     | C          | 6  | R69          | 2 A269 1 -D1269            |
|     | H          | 6  | R6_10        | 2 A26_10 1 D126_10         |
|     | C          | 9  | R9_11        | 6 A69_11 2 -D269_11        |
|     | H          | 9  | R9_12        | 6 A69_12 2 -D269_12        |
|     | O          | 11 | R11_13       | 9 A9_11_13 6 D69_11_13     |
|     | H          | 11 | R11_14       | 9 A9_11_14 6 -D69_11_14    |
|     | O          | 1  | R1_15        | 2 A21_15 6 -D621_15        |
|     | O          | 15 | R15_16       | 1 A1_15_16 2 -D21_15_16    |
|     | O          | 15 | R15_17       | 16 A16_15_17 1 D1_16_15_17 |
|     | Variables: |    |              | Multiplicity = 1           |
|     | R12        | =  | 1.53300727   | <b>Energies (Hartree)</b>  |
|     | R13        | =  | 1.09105306   |                            |
|     | A213       | =  | 110.79686923 | ZPE = -495.711709          |
| RC1 | R14        | =  | 1.09144497   | ZPE corr = 0.127444        |
|     | A314       | =  | 108.34594789 | H = -495.699070            |
|     | D2314      | =  | 121.57720515 | S = 110.82cal/mol-K        |
|     | R15        | =  | 1.09253055   |                            |
|     | A415       | =  | 107.98385519 |                            |
|     | D2415      | =  | 121.57664373 |                            |
|     | R26        | =  | 1.49467126   |                            |
|     | A126       | =  | 111.64292836 |                            |
|     | D3126      | =  | 178.39210505 |                            |
|     | R27        | =  | 1.09267196   |                            |
|     | A127       | =  | 110.58521565 |                            |
|     | D3127      | =  | 59.25131542  |                            |
|     | R28        | =  | 1.09607411   |                            |
|     | A128       | =  | 109.06529365 |                            |
|     | D3128      | =  | 58.47269615  |                            |
|     | R69        | =  | 1.33416106   |                            |
|     | A269       | =  | 125.54972180 |                            |
|     | D1269      | =  | 119.35125805 |                            |
|     | R6_10      | =  | 1.09131908   |                            |

|     |      |             |    |              |                                |
|-----|------|-------------|----|--------------|--------------------------------|
|     |      | A26_10      | =  | 116.23548859 |                                |
|     |      | D126_10     | =  | 60.06886200  |                                |
|     |      | R9_11       | =  | 1.47087570   |                                |
|     |      | A69_11      | =  | 120.54602441 |                                |
|     |      | D269_11     | =  | 179.20589676 |                                |
|     |      | R9_12       | =  | 1.08633016   |                                |
|     |      | A69_12      | =  | 122.31593378 |                                |
|     |      | D269_12     | =  | 0.86879217   |                                |
|     |      | R11_13      | =  | 1.20483445   |                                |
|     |      | A9_11_13    | =  | 124.42572465 |                                |
|     |      | D69_11_13   | =  | 178.20803228 |                                |
|     |      | R11_14      | =  | 1.10970255   |                                |
|     |      | A9_11_14    | =  | 114.83473614 |                                |
|     |      | D69_11_14   | =  | 1.46225875   |                                |
|     |      | R1_15       | =  | 5.45050734   |                                |
|     |      | A21_15      | =  | 13.65761921  |                                |
|     |      | D621_15     | =  | 40.84382744  |                                |
|     |      | R15_16      | =  | 1.39863791   |                                |
|     |      | A1_15_16    | =  | 55.36755875  |                                |
|     |      | D21_15_16   | =  | 26.23765920  |                                |
|     |      | R15_17      | =  | 1.39901676   |                                |
|     |      | A16_15_17   | =  | 60.01732312  |                                |
|     |      | D1_16_15_17 | =  | 61.67824231  |                                |
|     |      | C           |    |              |                                |
|     |      | C 1 R12     |    |              |                                |
|     |      | H 1 R13     | 2  | A213         |                                |
|     | H 1  | R14         | 3  | A314         | 2 D2314                        |
|     | H 1  | R15         | 4  | A415         | 2 D2415                        |
|     | C 2  | R26         | 1  | A126         | 3 -D3126                       |
|     | H 2  | R27         | 1  | A127         | 3 D3127                        |
|     | H 2  | R28         | 1  | A128         | 3 -D3128                       |
|     | C 6  | R69         | 2  | A269         | 1 -D1269                       |
|     | H 6  | R6_10       | 2  | A26_10       | 1 D126_10                      |
|     | C 9  | R9_11       | 6  | A69_11       | 2 D269_11                      |
|     | H 9  | R9_12       | 6  | A69_12       | 2 -D269_12                     |
|     | O 11 | R11_13      | 9  | A9_11_13     | 6 -D69_11_13                   |
|     | H 11 | R11_14      | 9  | A9_11_14     | 6 D69_11_14                    |
|     | O 1  | R1_15       | 2  | A21_15       | 6 D621_15                      |
| TS1 | O 15 | R15_16      | 1  | A1_15_16     | 2 -D21_15_16                   |
|     | O 15 | R15_17      | 16 | A16_15_17    | 1 -D1_16_15_17                 |
|     |      | Variables:  |    |              |                                |
|     |      | R12         | =  | 1.53470824   | Imaginary frequency =<br>326 i |
|     |      | R13         | =  | 1.09101315   |                                |
|     |      | A213        | =  | 110.46039038 |                                |
|     |      | R14         | =  | 1.09166599   |                                |
|     |      | A314        | =  | 108.42576591 |                                |
|     |      | D2314       | =  | 121.64050249 |                                |
|     |      | R15         | =  | 1.09215241   |                                |
|     |      | A415        | =  | 107.99256652 |                                |
|     |      | D2415       | =  | 121.67230548 |                                |
|     |      | R26         | =  | 1.49950055   |                                |

Multiplicity = 1

Energies (Hartree)

ZPE = -495.740511

ZPE corr = 0.129201

H = -495.729749

S = 98.12cal/mol-K

|    |  |             |    |              |     |          |      |            |                     |
|----|--|-------------|----|--------------|-----|----------|------|------------|---------------------|
|    |  | A126        | =  | 110.96954756 |     |          |      |            |                     |
|    |  | D3126       | =  | 178.47409969 |     |          |      |            |                     |
|    |  | R27         | =  | 1.09457447   |     |          |      |            |                     |
|    |  | A127        | =  | 109.81041122 |     |          |      |            |                     |
|    |  | D3127       | =  | 60.88795365  |     |          |      |            |                     |
|    |  | R28         | =  | 1.09131834   |     |          |      |            |                     |
|    |  | A128        | =  | 109.96464542 |     |          |      |            |                     |
|    |  | D3128       | =  | 57.11350788  |     |          |      |            |                     |
|    |  | R69         | =  | 1.37076731   |     |          |      |            |                     |
|    |  | A269        | =  | 122.49386278 |     |          |      |            |                     |
|    |  | D1269       | =  | 85.14953772  |     |          |      |            |                     |
|    |  | R6_10       | =  | 1.08771745   |     |          |      |            |                     |
|    |  | A26_10      | =  | 117.78705587 |     |          |      |            |                     |
|    |  | D126_10     | =  | 79.95760853  |     |          |      |            |                     |
|    |  | R9_11       | =  | 1.47940728   |     |          |      |            |                     |
|    |  | A69_11      | =  | 120.22336851 |     |          |      |            |                     |
|    |  | D269_11     | =  | 167.56627583 |     |          |      |            |                     |
|    |  | R9_12       | =  | 1.08598621   |     |          |      |            |                     |
|    |  | A69_12      | =  | 121.67823346 |     |          |      |            |                     |
|    |  | D269_12     | =  | 0.53109539   |     |          |      |            |                     |
|    |  | R11_13      | =  | 1.20130115   |     |          |      |            |                     |
|    |  | A9_11_13    | =  | 123.77306992 |     |          |      |            |                     |
|    |  | D69_11_13   | =  | 165.27692704 |     |          |      |            |                     |
|    |  | R11_14      | =  | 1.10794801   |     |          |      |            |                     |
|    |  | A9_11_14    | =  | 114.73022039 |     |          |      |            |                     |
|    |  | D69_11_14   | =  | 15.10008798  |     |          |      |            |                     |
|    |  | R1_15       | =  | 4.64025626   |     |          |      |            |                     |
|    |  | A21_15      | =  | 13.29579099  |     |          |      |            |                     |
|    |  | D621_15     | =  | 48.05298767  |     |          |      |            |                     |
|    |  | R15_16      | =  | 1.25848455   |     |          |      |            |                     |
|    |  | A1_15_16    | =  | 98.76529492  |     |          |      |            |                     |
|    |  | D21_15_16   | =  | 168.12072174 |     |          |      |            |                     |
|    |  | R15_17      | =  | 1.26477213   |     |          |      |            |                     |
|    |  | A16_15_17   | =  | 112.93562669 |     |          |      |            |                     |
|    |  | D1_16_15_17 | =  | 68.82346597  |     |          |      |            |                     |
| I1 |  |             |    | C            |     |          |      |            |                     |
|    |  |             |    | C            | 1   | R12      |      |            |                     |
|    |  |             | H  | 1            | R13 | 2        | A213 |            |                     |
|    |  | H           | 1  | R14          | 3   | A314     | 2    | D2314      |                     |
|    |  | H           | 1  | R15          | 4   | A415     | 2    | D2415      | Multiplicity = 1    |
|    |  | C           | 2  | R26          | 1   | A126     | 3    | D3126      |                     |
|    |  | H           | 2  | R27          | 1   | A127     | 3    | D3127      | Energies (Hartree)  |
|    |  | H           | 2  | R28          | 1   | A128     | 3    | -D3128     |                     |
|    |  | C           | 6  | R69          | 2   | A269     | 1    | -D1269     | ZPE = -495.847525   |
|    |  | H           | 6  | R6_10        | 2   | A26_10   | 1    | D126_10    | ZPE corr = 0.133385 |
|    |  | O           | 6  | R6_11        | 2   | A26_11   | 1    | D126_11    | H = -495.837626     |
|    |  | C           | 9  | R9_12        | 6   | A69_12   | 2    | D269_12    | S = 93.89cal/mol-K  |
|    |  | H           | 9  | R9_13        | 6   | A69_13   | 2    | D269_13    |                     |
|    |  | O           | 9  | R9_14        | 6   | A69_14   | 2    | -D269_14   |                     |
|    |  | O           | 12 | R12_15       | 9   | A9_12_15 | 6    | -D69_12_15 |                     |
|    |  | H           | 12 | R12_16       | 9   | A9_12_16 | 6    | D69_12_16  |                     |

H

Multiplicity = 1

**Energies (Hartree)**

|   |    |        |    |           |    |               |                       |
|---|----|--------|----|-----------|----|---------------|-----------------------|
| H | 1  | R15    | 4  | A415      | 2  | D2415         | ZPE = -495.815948     |
| C | 2  | R26    | 1  | A126      | 3  | -D3126        | ZPE corr = 0.130528   |
| H | 2  | R27    | 1  | A127      | 3  | D3127         | H = -495.805937       |
| H | 2  | R28    | 1  | A128      | 3  | -D3128        | S = 93.28cal/mol-K    |
| H | 6  | R69    | 2  | A269      | 1  | D1269         |                       |
| O | 6  | R6_10  | 2  | A26_10    | 1  | D126_10       | Imaginary frequency = |
| O | 10 | R10_11 | 6  | A6_10_11  | 2  | D26_10_11     | 512i                  |
| C | 1  | R1_12  | 2  | A21_12    | 6  | D621_12       |                       |
| C | 12 | R12_13 | 1  | A1_12_13  | 2  | -D21_12_13    |                       |
| H | 12 | R12_14 | 13 | A13_12_14 | 1  | D1_13_12_14   |                       |
| O | 12 | R12_15 | 13 | A13_12_15 | 1  | -D1_13_12_15  |                       |
| O | 13 | R13_16 | 12 | A12_13_16 | 14 | D14_12_13_16  |                       |
| H | 13 | R13_17 | 12 | A12_13_17 | 14 | -D14_12_13_17 |                       |

## Variables:

|             |   |              |
|-------------|---|--------------|
| R12         | = | 1.52483417   |
| R13         | = | 1.08995740   |
| A213        | = | 110.16624096 |
| R14         | = | 1.09232486   |
| A314        | = | 107.66808366 |
| D2314       | = | 121.91028876 |
| R15         | = | 1.09206957   |
| A415        | = | 107.94983529 |
| D2415       | = | 122.64189802 |
| R26         | = | 1.50703219   |
| A126        | = | 111.66032710 |
| D3126       | = | 179.15152525 |
| R27         | = | 1.09026541   |
| A127        | = | 112.09588265 |
| D3127       | = | 57.32091349  |
| R28         | = | 1.09723677   |
| A128        | = | 110.84499489 |
| D3128       | = | 61.46798964  |
| R69         | = | 1.08922685   |
| A269        | = | 118.42841142 |
| D1269       | = | 30.51960160  |
| R6_10       | = | 1.33037903   |
| A26_10      | = | 118.55678459 |
| D126_10     | = | 167.98938130 |
| R10_11      | = | 1.30337102   |
| A6_10_11    | = | 110.48729056 |
| D26_10_11   | = | 44.57200355  |
| R1_12       | = | 3.42512321   |
| A21_12      | = | 48.99714532  |
| D621_12     | = | 45.49609541  |
| R12_13      | = | 1.51386425   |
| A1_12_13    | = | 121.83387031 |
| D21_12_13   | = | 121.73741927 |
| R12_14      | = | 1.10066429   |
| A13_12_14   | = | 114.36205141 |
| D1_13_12_14 | = | 55.90978617  |
| R12_15      | = | 1.27098434   |

|  |  |                     |    |              |  |
|--|--|---------------------|----|--------------|--|
|  |  | A13_12_15           | =  | 117.77036061 |  |
|  |  | D1_13_12_15         | =  | 156.62239028 |  |
|  |  | R13_16              | =  | 1.19936218   |  |
|  |  | A12_13_16           | =  | 122.56747042 |  |
|  |  | D14_12_13_16        | =  | 16.50736742  |  |
|  |  | R13_17              | =  | 1.10688304   |  |
|  |  | A12_13_17           | =  | 114.31892762 |  |
|  |  | D14_12_13_17        | =  | 163.81597677 |  |
|  |  | C                   |    |              |  |
|  |  | C                   | 1  | R12          |  |
|  |  | H                   | 1  | R13          |  |
|  |  | H                   | 1  | R14          |  |
|  |  | H                   | 1  | R15          |  |
|  |  | C                   | 2  | R26          |  |
|  |  | H                   | 2  | R27          |  |
|  |  | H                   | 2  | R28          |  |
|  |  | H                   | 6  | R69          |  |
|  |  | O                   | 6  | R6_10        |  |
|  |  | O                   | 10 | R10_11       |  |
|  |  | C                   | 1  | R1_12        |  |
|  |  | C                   | 12 | R12_13       |  |
|  |  | H                   | 12 | R12_14       |  |
|  |  | O                   | 12 | R12_15       |  |
|  |  | O                   | 13 | R13_16       |  |
|  |  | H                   | 13 | R13_17       |  |
|  |  | Variables:          |    |              |  |
|  |  | R12                 | =  | 1.52658611   |  |
|  |  | R13                 | =  | 1.08952502   |  |
|  |  | A213                | =  | 110.10122775 |  |
|  |  | R14                 | =  | 1.09063981   |  |
|  |  | A314                | =  | 108.35205421 |  |
|  |  | D2314               | =  | 120.22708792 |  |
|  |  | R15                 | =  | 1.09244151   |  |
|  |  | A315                | =  | 107.87406943 |  |
|  |  | D2315               | =  | 122.06586882 |  |
|  |  | R26                 | =  | 1.47503332   |  |
|  |  | A126                | =  | 111.70765166 |  |
|  |  | D3126               | =  | 176.31420126 |  |
|  |  | R27                 | =  | 1.08819918   |  |
|  |  | A127                | =  | 112.87512370 |  |
|  |  | D3127               | =  | 61.07839917  |  |
|  |  | R28                 | =  | 1.10052369   |  |
|  |  | A128                | =  | 111.62614334 |  |
|  |  | D3128               | =  | 58.34309966  |  |
|  |  | R69                 | =  | 1.08956291   |  |
|  |  | A269                | =  | 122.16211409 |  |
|  |  | D1269               | =  | 28.13140207  |  |
|  |  | R6_10               | =  | 1.24683435   |  |
|  |  | A26_10              | =  | 125.25488009 |  |
|  |  | D126_10             | =  | 155.57690708 |  |
|  |  | R10_11              | =  | 1.37227235   |  |
|  |  | Multiplicity = 1    |    |              |  |
|  |  | Energies (Hartree)  |    |              |  |
|  |  | ZPE = -495.867187   |    |              |  |
|  |  | ZPE corr = 0.129263 |    |              |  |
|  |  | H = -495.855340     |    |              |  |
|  |  | S = 103.34cal/mol-K |    |              |  |

I2

|       |              |    |              |                               |
|-------|--------------|----|--------------|-------------------------------|
|       | A6_10_11     | =  | 117.93621939 |                               |
|       | D26_10_11    | =  | 5.90386358   |                               |
|       | R1_12        | =  | 4.78251092   |                               |
|       | A21_12       | =  | 45.76263413  |                               |
|       | D621_12      | =  | 93.38498195  |                               |
|       | R12_13       | =  | 1.51922926   |                               |
|       | A1_12_13     | =  | 62.05599662  |                               |
|       | D21_12_13    | =  | 96.90663846  |                               |
|       | R12_14       | =  | 1.10674033   |                               |
|       | A13_12_14    | =  | 114.80762071 |                               |
|       | D1_13_12_14  | =  | 12.61724440  |                               |
|       | R12_15       | =  | 1.19591236   |                               |
|       | A13_12_15    | =  | 121.81331385 |                               |
|       | D1_13_12_15  | =  | 169.91842269 |                               |
|       | R13_16       | =  | 1.20762167   |                               |
|       | A12_13_16    | =  | 121.35892266 |                               |
|       | D14_12_13_16 | =  | 16.36399647  |                               |
|       | R13_17       | =  | 1.10209055   |                               |
|       | A12_13_17    | =  | 115.03722448 |                               |
|       | D14_12_13_17 | =  | 167.93492835 |                               |
| <hr/> |              |    |              |                               |
|       | C            |    |              |                               |
|       | C            | 1  | R12          |                               |
|       | H            | 1  | R13          | 2 A213                        |
|       | H            | 1  | R14          | 3 A314 2 D2314                |
|       | H            | 1  | R15          | 4 A415 2 D2415                |
|       | C            | 2  | R26          | 1 A126 3 -D3126               |
|       | H            | 2  | R27          | 1 A127 3 D3127                |
|       | H            | 2  | R28          | 1 A128 3 -D3128               |
|       | H            | 6  | R69          | 2 A269 1 D1269                |
|       | O            | 6  | R6_10        | 2 A26_10 1 -D126_10           |
|       | C            | 1  | R1_11        | 4 A41_11 2 D241_11            |
|       | C            | 11 | R11_12       | 1 A1_11_12 2 -D21_11_12       |
|       | H            | 11 | R11_13       | 12 A12_11_13 1 D1_12_11_13    |
|       | O            | 11 | R11_14       | 12 A12_11_14 1 -D1_12_11_14   |
|       | O            | 12 | R12_15       | 11 A11_12_15 13 D13_11_12_15  |
|       | H            | 12 | R12_16       | 11 A11_12_16 13 -D13_11_12_16 |
| TS3   | O            | 14 | R14_17       | 11 A11_14_17 12 D12_11_14_17  |
|       |              |    | Variables:   |                               |
|       | R12          | =  | 1.52476948   |                               |
|       | R13          | =  | 1.09057073   |                               |
|       | A213         | =  | 110.45735745 |                               |
|       | R14          | =  | 1.09150119   |                               |
|       | A314         | =  | 107.86565441 |                               |
|       | D2314        | =  | 123.42942189 |                               |
|       | R15          | =  | 1.09341828   |                               |
|       | A415         | =  | 107.28714441 |                               |
|       | D2415        | =  | 122.22950686 |                               |
|       | R26          | =  | 1.52119312   |                               |
|       | A126         | =  | 114.04005955 |                               |
|       | D3126        | =  | 172.23883488 |                               |
|       | R27          | =  | 1.09400636   |                               |
|       |              |    |              | Multiplicity = 1              |
|       |              |    |              | Energies (Hartree)            |
|       |              |    |              | ZPE = -495.806516             |
|       |              |    |              | ZPE corr = 0.130271           |
|       |              |    |              | H = -495.796445               |
|       |              |    |              | S = 93.51cal/mol-K            |
|       |              |    |              | Imaginary frequency =<br>576i |



|  |  |              |    |              |    |
|--|--|--------------|----|--------------|----|
|  |  | A127         | =  | 112.15727306 |    |
|  |  | D3127        | =  | 64.24675841  |    |
|  |  | R28          | =  | 1.09434074   |    |
|  |  | A128         | =  | 109.99038638 |    |
|  |  | D3128        | =  | 53.71655876  |    |
|  |  | R69          | =  | 1.10302315   |    |
|  |  | A269         | =  | 115.99561432 |    |
|  |  | D1269        | =  | 38.86027410  |    |
|  |  | R6_10        | =  | 1.27299837   |    |
|  |  | A26_10       | =  | 118.80012680 |    |
|  |  | D126_10      | =  | 176.14771574 |    |
|  |  | R1_11        | =  | 3.18800186   |    |
|  |  | A41_11       | =  | 59.33901109  |    |
|  |  | D241_11      | =  | 29.00062161  |    |
|  |  | R11_12       | =  | 1.49009536   |    |
|  |  | A1_11_12     | =  | 90.82672926  |    |
|  |  | D21_11_12    | =  | 151.91102763 |    |
|  |  | R11_13       | =  | 1.08710239   |    |
|  |  | A12_11_13    | =  | 119.94050590 |    |
|  |  | D1_12_11_13  | =  | 61.19142000  |    |
|  |  | R11_14       | =  | 1.32504186   |    |
|  |  | A12_11_14    | =  | 111.43670131 |    |
|  |  | D1_12_11_14  | =  | 157.33146488 |    |
|  |  | R12_15       | =  | 1.19918339   |    |
|  |  | A11_12_15    | =  | 122.87644691 |    |
|  |  | D13_11_12_15 | =  | 22.17121771  |    |
|  |  | R12_16       | =  | 1.10530030   |    |
|  |  | A11_12_16    | =  | 114.40660843 |    |
|  |  | D13_11_12_16 | =  | 159.38370017 |    |
|  |  | R14_17       | =  | 1.29645169   |    |
|  |  | A11_14_17    | =  | 111.23740237 |    |
|  |  | D12_11_14_17 | =  | 171.70188454 |    |
|  |  | <hr/>        |    |              |    |
|  |  | C            |    |              |    |
|  |  | C            | 1  | R12          |    |
|  |  | H            | 1  | R13          | 2  |
|  |  | H            | 1  | R14          | 3  |
|  |  | H            | 1  | R15          | 3  |
|  |  | C            | 2  | R26          | 1  |
|  |  | H            | 2  | R27          | 1  |
|  |  | H            | 2  | R28          | 1  |
|  |  | H            | 6  | R69          | 2  |
|  |  | O            | 6  | R6_10        | 2  |
|  |  | C            | 1  | R1_11        | 2  |
|  |  | C            | 11 | R11_12       | 1  |
|  |  | H            | 11 | R11_13       | 12 |
|  |  | O            | 11 | R11_14       | 12 |
|  |  | O            | 12 | R12_15       | 11 |
|  |  | H            | 12 | R12_16       | 11 |
|  |  | O            | 14 | R14_17       | 11 |
|  |  | Variables:   |    |              |    |
|  |  | R12          | =  | 1.52430633   |    |
|  |  | <hr/>        |    |              |    |
|  |  | C            |    |              |    |
|  |  | C            | 1  | R12          |    |
|  |  | H            | 1  | R13          | 2  |
|  |  | H            | 1  | R14          | 3  |
|  |  | H            | 1  | R15          | 3  |
|  |  | C            | 2  | R26          | 1  |
|  |  | H            | 2  | R27          | 1  |
|  |  | H            | 2  | R28          | 1  |
|  |  | H            | 6  | R69          | 2  |
|  |  | O            | 6  | R6_10        | 2  |
|  |  | C            | 1  | R1_11        | 2  |
|  |  | C            | 11 | R11_12       | 1  |
|  |  | H            | 11 | R11_13       | 12 |
|  |  | O            | 11 | R11_14       | 12 |
|  |  | O            | 12 | R12_15       | 11 |
|  |  | H            | 12 | R12_16       | 11 |
|  |  | O            | 14 | R14_17       | 11 |
|  |  | Variables:   |    |              |    |
|  |  | R12          | =  | 1.52430633   |    |
|  |  | <hr/>        |    |              |    |
|  |  | C            |    |              |    |
|  |  | C            | 1  | R12          |    |
|  |  | H            | 1  | R13          | 2  |
|  |  | H            | 1  | R14          | 3  |
|  |  | H            | 1  | R15          | 3  |
|  |  | C            | 2  | R26          | 1  |
|  |  | H            | 2  | R27          | 1  |
|  |  | H            | 2  | R28          | 1  |
|  |  | H            | 6  | R69          | 2  |
|  |  | O            | 6  | R6_10        | 2  |
|  |  | C            | 1  | R1_11        | 2  |
|  |  | C            | 11 | R11_12       | 1  |
|  |  | H            | 11 | R11_13       | 12 |
|  |  | O            | 11 | R11_14       | 12 |
|  |  | O            | 12 | R12_15       | 11 |
|  |  | H            | 12 | R12_16       | 11 |
|  |  | O            | 14 | R14_17       | 11 |
|  |  | Variables:   |    |              |    |
|  |  | R12          | =  | 1.52430633   |    |
|  |  | <hr/>        |    |              |    |
|  |  | C            |    |              |    |
|  |  | C            | 1  | R12          |    |
|  |  | H            | 1  | R13          | 2  |
|  |  | H            | 1  | R14          | 3  |
|  |  | H            | 1  | R15          | 3  |
|  |  | C            | 2  | R26          | 1  |
|  |  | H            | 2  | R27          | 1  |
|  |  | H            | 2  | R28          | 1  |
|  |  | H            | 6  | R69          | 2  |
|  |  | O            | 6  | R6_10        | 2  |
|  |  | C            | 1  | R1_11        | 2  |
|  |  | C            | 11 | R11_12       | 1  |
|  |  | H            | 11 | R11_13       | 12 |
|  |  | O            | 11 | R11_14       | 12 |
|  |  | O            | 12 | R12_15       | 11 |
|  |  | H            | 12 | R12_16       | 11 |
|  |  | O            | 14 | R14_17       | 11 |
|  |  | Variables:   |    |              |    |
|  |  | R12          | =  | 1.52430633   |    |
|  |  | <hr/>        |    |              |    |
|  |  | C            |    |              |    |
|  |  | C            | 1  | R12          |    |
|  |  | H            | 1  | R13          | 2  |
|  |  | H            | 1  | R14          | 3  |
|  |  | H            | 1  | R15          | 3  |
|  |  | C            | 2  | R26          | 1  |
|  |  | H            | 2  | R27          | 1  |
|  |  | H            | 2  | R28          | 1  |
|  |  | H            | 6  | R69          | 2  |
|  |  | O            | 6  | R6_10        | 2  |
|  |  | C            | 1  | R1_11        | 2  |
|  |  | C            | 11 | R11_12       | 1  |
|  |  | H            | 11 | R11_13       | 12 |
|  |  | O            | 11 | R11_14       | 12 |
|  |  | O            | 12 | R12_15       | 11 |
|  |  | H            | 12 | R12_16       | 11 |
|  |  | O            | 14 | R14_17       | 11 |
|  |  | Variables:   |    |              |    |
|  |  | R12          | =  | 1.52430633   |    |
|  |  | <hr/>        |    |              |    |
|  |  | C            |    |              |    |
|  |  | C            | 1  | R12          |    |
|  |  | H            | 1  | R13          | 2  |
|  |  | H            | 1  | R14          | 3  |
|  |  | H            | 1  | R15          | 3  |
|  |  | C            | 2  | R26          | 1  |
|  |  | H            | 2  | R27          | 1  |
|  |  | H            | 2  | R28          | 1  |
|  |  | H            | 6  | R69          | 2  |
|  |  | O            | 6  | R6_10        | 2  |
|  |  | C            | 1  | R1_11        | 2  |
|  |  | C            | 11 | R11_12       | 1  |
|  |  | H            | 11 | R11_13       | 12 |
|  |  | O            | 11 | R11_14       | 12 |
|  |  | O            | 12 | R12_15       | 11 |
|  |  | H            | 12 | R12_16       | 11 |
|  |  | O            | 14 | R14_17       | 11 |
|  |  | Variables:   |    |              |    |
|  |  | R12          | =  | 1.52430633   |    |
|  |  | <hr/>        |    |              |    |
|  |  | C            |    |              |    |
|  |  | C            | 1  | R12          |    |
|  |  | H            | 1  | R13          | 2  |
|  |  | H            | 1  | R14          | 3  |
|  |  | H            | 1  | R15          | 3  |
|  |  | C            | 2  | R26          | 1  |
|  |  | H            | 2  | R27          | 1  |
|  |  | H            | 2  | R28          | 1  |
|  |  | H            | 6  | R69          | 2  |
|  |  | O            | 6  | R6_10        | 2  |
|  |  | C            | 1  | R1_11        | 2  |
|  |  | C            | 11 | R11_12       | 1  |
|  |  | H            | 11 | R11_13       | 12 |
|  |  | O            | 11 | R11_14       | 12 |
|  |  | O            | 12 | R12_15       | 11 |
|  |  | H            | 12 | R12_16       | 11 |
|  |  | O            | 14 | R14_17       | 11 |
|  |  | Variables:   |    |              |    |
|  |  | R12          | =  | 1.52430633   |    |
|  |  | <hr/>        |    |              |    |
|  |  | C            |    |              |    |
|  |  | C            | 1  | R12          |    |
|  |  | H            | 1  | R13          | 2  |
|  |  | H            | 1  | R14          | 3  |
|  |  | H            | 1  | R15          | 3  |
|  |  | C            | 2  | R26          | 1  |
|  |  | H            | 2  | R27          | 1  |
|  |  | H            | 2  | R28          | 1  |
|  |  | H            | 6  | R69          | 2  |
|  |  | O            | 6  | R6_10        | 2  |
|  |  | C            | 1  | R1_11        | 2  |
|  |  | C            | 11 | R11_12       | 1  |
|  |  | H            | 11 | R11_13       | 12 |
|  |  | O            | 11 | R11_14       | 12 |
|  |  | O            | 12 | R12_15       | 11 |
|  |  | H            | 12 | R12_16       | 11 |
|  |  | O            | 14 | R14_17       | 11 |
|  |  | Variables:   |    |              |    |
|  |  | R12          | =  | 1.52430633   |    |
|  |  | <hr/>        |    |              |    |
|  |  | C            |    |              |    |
|  |  | C            | 1  | R12          |    |
|  |  | H            | 1  | R13          | 2  |
|  |  | H            | 1  | R14          | 3  |
|  |  | H            | 1  | R15          | 3  |
|  |  | C            | 2  | R26          | 1  |
|  |  | H            | 2  | R27          | 1  |
|  |  | H            | 2  | R28          | 1  |
|  |  | H            | 6  | R69          | 2  |
|  |  | O            | 6  | R6_10        | 2  |
|  |  | C            | 1  | R1_11        | 2  |
|  |  | C            | 11 | R11_12       | 1  |
|  |  | H            | 11 | R11_13       | 12 |
|  |  | O            | 11 | R11_14       | 12 |
|  |  | O            | 12 | R12_15       | 11 |
|  |  | H            | 12 | R12_16       | 11 |
|  |  | O            | 14 | R14_17       | 11 |
|  |  | Variables:   |    |              |    |
|  |  | R12          | =  | 1.52430633   |    |
|  |  | <hr/>        |    |              |    |
|  |  | C            |    |              |    |
|  |  | C            | 1  | R12          |    |
|  |  | H            | 1  | R13          | 2  |
|  |  | H            | 1  | R14          | 3  |
|  |  | H            | 1  | R15          | 3  |
|  |  | C            | 2  | R26          | 1  |
|  |  | H            | 2  | R27          | 1  |
|  |  | H            | 2  | R28          | 1  |
|  |  | H            | 6  | R69          | 2  |
|  |  | O            | 6  | R6_10        | 2  |
|  |  | C            | 1  | R1_11        | 2  |
|  |  | C            | 11 | R11_12       | 1  |
|  |  | H            | 11 | R11_13       | 12 |
|  |  | O            | 11 | R11_14       | 12 |
|  |  | O            | 12 | R12_15       | 11 |
|  |  | H            | 12 | R12_16       | 11 |
|  |  | O            | 14 | R14_17       | 11 |
|  |  | Variables:   |    |              |    |
|  |  | R12          | =  | 1.52430633   |    |
|  |  | <hr/>        |    |              |    |
|  |  | C            |    |              |    |
|  |  | C            | 1  | R12          |    |
|  |  | H            | 1  | R13          | 2  |
|  |  | H            | 1  | R14          | 3  |
|  |  | H            | 1  | R15          | 3  |
|  |  | C            | 2  | R26          | 1  |
|  |  | H            | 2  | R27          | 1  |
|  |  | H            | 2  | R28          | 1  |
|  |  | H            | 6  | R69          | 2  |
|  |  | O            | 6  | R6_10        | 2  |
|  |  | C            | 1  | R1_11        | 2  |
|  |  | C            | 11 | R11_12       | 1  |
|  |  | H            | 11 | R11_13       | 12 |
|  |  | O            | 11 | R11_14       | 12 |
|  |  | O            | 12 | R12_15       | 11 |
|  |  | H            | 12 | R12_16       | 11 |
|  |  | O            | 14 | R14_17       | 11 |
|  |  | Variables:   |    |              |    |
|  |  | R12          | =  | 1.52430633   |    |
|  |  | <hr/>        |    |              |    |
|  |  | C            |    |              |    |
|  |  | C            | 1  | R12          |    |
|  |  | H            | 1  | R13          | 2  |
|  |  | H            | 1  | R14          | 3  |
|  |  | H            | 1  | R15          | 3  |
|  |  | C            | 2  | R26          | 1  |
|  |  | H            | 2  | R27          | 1  |
|  |  | H            | 2  | R28          | 1  |
|  |  | H            | 6  | R69          | 2  |
|  |  | O            | 6  | R6_10        | 2  |
|  |  | C            | 1  | R1_11        | 2  |
|  |  | C            | 11 | R11_12       | 1  |
|  |  | H            | 11 | R11_13       | 12 |
|  |  | O            | 11 | R11_14       | 12 |
|  |  | O            | 12 | R12_15       | 11 |
|  |  | H            | 12 | R12_16       | 11 |
|  |  | O            | 14 | R14_17       | 11 |
|  |  | Variables:   |    |              |    |
|  |  | R12          | =  | 1.52430633   |    |
|  |  | <hr/>        |    |              |    |
|  |  | C            |    |              |    |
|  |  | C            | 1  | R12          |    |
|  |  | H            | 1  | R13          | 2  |
|  |  | H            | 1  | R14          | 3  |
|  |  | H            | 1  | R15          | 3  |
|  |  | C            | 2  | R26          | 1  |
|  |  | H            | 2  | R27          | 1  |
|  |  | H            | 2  | R28          | 1  |
|  |  | H            | 6  | R69          | 2  |
|  |  | O            | 6  | R6_10        | 2  |
|  |  | C            | 1  | R1_11        | 2  |
|  |  | C            | 11 | R11_12       | 1  |
|  |  | H            | 11 | R11_13       | 12 |
|  |  | O            | 11 | R11_14       | 12 |
|  |  | O            | 12 | R12_15       | 11 |
|  |  | H            | 12 | R12_16       | 11 |
|  |  | O            | 14 | R14_17       | 11 |
|  |  | Variables:   |    |              |    |
|  |  | R12          | =  | 1.52430633   |    |
|  |  | <hr/>        |    |              |    |
|  |  | C            |    |              |    |
|  |  | C            | 1  | R12          |    |
|  |  | H            | 1  | R13          | 2  |
|  |  | H            | 1  | R14          | 3  |
|  |  | H            | 1  | R15          | 3  |
|  |  | C            | 2  | R26          | 1  |
|  |  | H            | 2  | R27          | 1  |
|  |  | H            | 2  | R28          | 1  |
|  |  | H            | 6  | R69          | 2  |
|  |  | O            | 6  | R6_10        | 2  |
|  |  | C            | 1  | R1_11        | 2  |
|  |  | C            | 11 | R11_12       | 1  |
|  |  | H            | 11 | R11_13       | 12 |
|  |  | O            | 11 | R11_14       | 12 |
|  |  | O            | 12 | R12_15       | 11 |
|  |  | H            | 12 | R12_16       | 11 |
|  |  | O            | 14 | R14_17       | 11 |
|  |  | Variables:   |    |              |    |
|  |  | R12          | =  | 1.52430633   |    |
|  |  | <hr/>        |    |              |    |
|  |  | C            |    |              |    |
|  |  | C            | 1  | R12          |    |
|  |  | H            | 1  | R13          | 2  |
|  |  | H            | 1  | R14          | 3  |
|  |  | H            | 1  | R15          | 3  |
|  |  | C            | 2  | R26          | 1  |
|  |  | H            | 2  | R27          | 1  |
|  |  | H            | 2  | R28          | 1  |
|  |  | H            | 6  | R69          | 2  |
|  |  | O            | 6  | R6_10        | 2  |
|  |  | C            | 1  | R1_11        | 2  |
|  |  | C            | 11 | R11_12       | 1  |
|  |  | H            | 11 | R11_13       | 12 |
|  |  | O            | 11 | R11_14       | 12 |
|  |  | O            | 12 | R12_15       | 11 |
|  |  | H            | 12 | R12_16       | 11 |
|  |  | O            | 14 | R14_17       | 11 |
|  |  | Variables:   |    |              |    |
|  |  | R12          | =  | 1.52430633   |    |
|  |  | <hr/>        |    |              |    |
|  |  | C            |    |              |    |
|  |  | C            | 1  | R12          |    |
|  |  | H            | 1  | R13          | 2  |
|  |  | H            | 1  | R14          | 3  |

---

|              |   |              |
|--------------|---|--------------|
| R13          | = | 1.09050676   |
| A213         | = | 110.82701428 |
| R14          | = | 1.09050359   |
| A314         | = | 108.67562624 |
| D2314        | = | 121.19867888 |
| R15          | = | 1.09306535   |
| A315         | = | 107.64434036 |
| D2315        | = | 121.53482369 |
| R26          | = | 1.50549879   |
| A126         | = | 113.08582113 |
| D3126        | = | 175.98334121 |
| R27          | = | 1.09264796   |
| A127         | = | 112.27248574 |
| D3127        | = | 61.65101872  |
| R28          | = | 1.09770500   |
| A128         | = | 110.66637470 |
| D3128        | = | 57.38137130  |
| R69          | = | 1.10630599   |
| A269         | = | 116.07049277 |
| D1269        | = | 23.53063837  |
| R6_10        | = | 1.21175421   |
| A26_10       | = | 123.79990819 |
| D126_10      | = | 160.07778967 |
| R1_11        | = | 4.84714915   |
| A21_11       | = | 48.81902317  |
| D621_11      | = | 48.73094602  |
| R11_12       | = | 1.48791079   |
| A1_11_12     | = | 131.46737190 |
| D21_11_12    | = | 40.28964752  |
| R11_13       | = | 1.08563147   |
| A12_11_13    | = | 123.87001470 |
| D1_12_11_13  | = | 132.59927858 |
| R11_14       | = | 1.24738223   |
| A12_11_14    | = | 115.77418859 |
| D1_12_11_14  | = | 48.29755256  |
| R12_15       | = | 1.19725448   |
| A11_12_15    | = | 120.82050706 |
| D13_11_12_15 | = | 4.09868407   |
| R12_16       | = | 1.10248918   |
| A11_12_16    | = | 115.32365792 |
| D13_11_12_16 | = | 175.88964708 |
| R14_17       | = | 1.34277776   |
| A11_14_17    | = | 118.10957515 |
| D12_11_14_17 | = | 176.05105782 |

---
